# Supplementary material for: Antimicrobial Resistance in Escherichia coli and Its Correlation with Antimicrobial Use on Commercial Poultry Farms in Bangladesh
Source: MDPI journal article supplement (doi:10.3390/antibiotics12091361), 2023-08-24
Supplement: s1 [file s1]

Table S1: Minimum inhibitory concentration distribution for *E. coli* in fecal samples of broiler

| Antimicrobial agent | Number of strains with MIC (mg/ml) |      |      |      |      |      |     |    |     |     |    |    |     |     |             |     |              |     |           |     |           |     |               |     | No. of isolates |
|---------------------|------------------------------------|------|------|------|------|------|-----|----|-----|-----|----|----|-----|-----|-------------|-----|--------------|-----|-----------|-----|-----------|-----|---------------|-----|-----------------|
|                     |                                    |      |      |      |      |      |     |    |     |     |    |    |     |     | Susceptible |     | Intermediate |     | Resistant |     | Wild type |     | Non-wild type |     |                 |
|                     | ≤0.03                              | 0.06 | 0.12 | 0.25 | 0.5  | 1    | 2   | 4  | 8   | 16  | 32 | 64 | 128 | 256 | [n]         | [%] | [n]          | [%] | [n]       | [%] | [n]       | [%] | [n]           | [%] |                 |
| Gentamicin          |                                    |      |      |      | *43  | 156  | 119 | 24 | 2   | 1   | 5  | 89 |     |     | 318         | 72  | 26           | 6   | 95        | 22  | 318       | 72  | 121           | 28  | 439             |
| Tetracycline        |                                    |      |      |      |      |      | *1  | 6  | 4   |     | 4  | 44 | 380 |     | 1           | 0   | 10           | 2   | 428       | 98  | 11        | 3   | 428           | 97  | 439             |
| Ceftazidime         |                                    |      |      |      | *415 | 4    | 2   | 2  | 8   | 8   |    |    |     |     | 421         | 96  | 10           | 2   | 8         | 2   | 419       | 95  | 20            | 5   | 439             |
| Trimethoprim        |                                    |      |      | *12  | 6    | 3    | 1   |    |     |     |    |    |     |     | 22          | 5   | 0            | 0   | 417       | 95  | 22        | 5   | 417           | 95  | 439             |
| Ampicillin          |                                    |      |      |      |      |      | 13  | 17 |     |     |    | 3  | 406 |     | 30          | 7   | 0            | 0   | 409       | 93  | 30        | 7   | 409           | 93  | 439             |
| Chloramphenicol     |                                    |      |      |      |      |      |     |    | *73 | 98  | 58 | 60 | 50  | 100 | 0           | 0   | 171          | 39  | 268       | 61  | 171       | 39  | 268           | 61  | 439             |
| Azithromycin        |                                    |      |      |      |      |      |     |    | 30  | 139 | 71 | 48 | 151 |     | 30          | 7   | 139          | 31  | 270       | 62  | 169       | 38  | 270           | 62  | 439             |
| Nalidixic acid      |                                    |      |      |      |      |      |     | *9 | 13  | 25  | 2  | 5  | 6   | 379 | 22          | 5   | 25           | 6   | 392       | 89  | 22        | 5   | 417           | 95  | 439             |
| Colistin            |                                    |      |      |      |      | *377 | 3   | 24 | 34  | 1   |    |    |     |     | 377         | 86  | 3            | 1   | 59        | 13  | 380       | 87  | 59            | 13  | 439             |
| Cefotaxime          |                                    |      |      | *417 | 3    | 2    | 4   | 1  | 12  |     |    |    |     |     | 420         | 96  | 6            | 1   | 13        | 3   | 417       | 95  | 22            | 5   | 439             |
| Meropenem           | *439                               |      |      |      |      |      |     |    |     |     |    |    |     |     | 439         | 100 | 0            | 0   | 0         | 0   | 439       | 100 | 0             | 0   | 439             |
| Ciprofloxacin       | *7                                 |      |      | 2    | 27   | 18   | 10  | 18 | 19  | 338 |    |    |     |     | 7           | 2   | 29           | 6   | 403       | 92  | 7         | 2   | 432           | 98  | 439             |
| Tigecycline         |                                    |      |      | *201 | 136  | 79   | 17  | 2  | 1   | 3   |    |    |     |     | -           | -   | -            | -   | -         | -   | 337       | 77  | 102           | 23  | 439             |

| Antimicrobial agent | Number of strains with MIC (mg/ml) |    |    |    |     |     |     |      |      |     |             |     |              |     |           |     |           |     | No. of isolates |               |  |
|---------------------|------------------------------------|----|----|----|-----|-----|-----|------|------|-----|-------------|-----|--------------|-----|-----------|-----|-----------|-----|-----------------|---------------|--|
|                     |                                    |    |    |    |     |     |     |      |      |     | Susceptible |     | Intermediate |     | Resistant |     | Wild type |     |                 | Non-wild type |  |
|                     | ≤8                                 | 16 | 32 | 64 | 128 | 256 | 512 | 1024 | 2048 | [n] | [%]         | [n] | [%]          | [n] | [%]       | [n] | [%]       | [n] |                 | [%]           |  |
| Sulfamethaxole      | *8                                 | 7  | 6  | 5  |     |     |     |      | 413  | 26  | 6           | 0   | 0            | 413 | 94        | 26  | 6         | 413 | 94              | 439           |  |

\* No visible growth at this concentration, meaning MIC is equal to or below this concentration. | -- CLSI breakpoint between susceptible and intermediate,

| -- CLSI breakpoint between intermediate and resistant and | -- ECOFF value between wild type and non-wild type.

Table S2: Minimum inhibitory concentration distribution for *E. coli* in environmental samples of broiler

| Antimicrobial agent | Number of strains with MIC (mg/ml) |      |      |      |     |    |    |     |     |     |    |    |     |     |             |     |              |     |           |     | No. of isolates |           |     |               |     |    |    |    |    |    |    |    |    |    |    |    |    |
|---------------------|------------------------------------|------|------|------|-----|----|----|-----|-----|-----|----|----|-----|-----|-------------|-----|--------------|-----|-----------|-----|-----------------|-----------|-----|---------------|-----|----|----|----|----|----|----|----|----|----|----|----|----|
|                     |                                    |      |      |      |     |    |    |     |     |     |    |    |     |     | Susceptible |     | Intermediate |     | Resistant |     |                 | Wild type |     | Non-wild type |     |    |    |    |    |    |    |    |    |    |    |    |    |
|                     | ≤0.03                              | 0.06 | 0.12 | 0.25 | 0.5 | 1  | 2  | 4   | 8   | 16  | 32 | 64 | 128 | 256 | [n]         | [%] | [n]          | [%] | [n]       | [%] |                 | [n]       | [%] | [n]           | [%] |    |    |    |    |    |    |    |    |    |    |    |    |
| Gentamicin          |                                    |      |      |      | *3  | 52 | 26 | 3   | 1   |     | 1  | 11 |     |     |             |     |              |     |           |     |                 |           |     | 81            | 84  | 4  | 4  | 12 | 12 | 81 | 84 | 16 | 16 | 97 |    |    |    |
| Tetracycline        |                                    |      |      |      |     |    |    | *1  | 1   |     |    | 1  | 14  | 80  |             |     |              |     |           |     |                 |           |     |               |     | 1  | 1  | 1  | 1  | 95 | 98 | 2  | 2  | 95 | 98 | 97 |    |
| Ceftazidime         |                                    |      |      |      | *89 | 4  | 4  |     |     |     |    |    |     |     |             |     |              |     | 97        | 100 | 0               | 0         | 0   | 0             | 93  | 96 | 4  | 4  | 97 |    |    |    |    |    |    |    |    |
| Trimethoprim        |                                    |      |      |      | *17 | 3  | 1  |     |     |     |    |    |     |     |             |     |              |     |           | 21  | 22              | 0         | 0   | 76            | 78  | 21 | 22 | 76 | 78 | 97 |    |    |    |    |    |    |    |
| Ampicillin          |                                    |      |      |      |     |    |    | 5   | 6   |     | 3  | 3  | 80  |     |             |     |              |     |           |     |                 |           |     |               | 11  | 11 | 3  | 3  | 83 | 86 | 11 | 11 | 86 | 89 | 97 |    |    |
| Chloramphenicol     |                                    |      |      |      |     |    |    |     |     | *28 | 36 | 3  | 12  | 7   | 11          |     |              |     |           |     |                 |           |     |               |     |    | 0  | 0  | 64 | 66 | 33 | 34 | 64 | 66 | 33 | 34 | 97 |
| Azithromycin        |                                    |      |      |      |     |    |    |     |     | 4   | 28 | 17 | 12  | 36  |             |     |              |     |           |     |                 |           |     |               |     | 4  | 4  | 28 | 29 | 65 | 67 | 32 | 33 | 65 | 67 | 97 |    |
| Nalidixic acid      |                                    |      |      |      |     |    |    |     | *11 | 13  | 8  | 3  | 1   | 61  |             |     |              |     |           |     |                 |           |     |               |     | 24 | 25 | 8  | 8  | 65 | 67 | 24 | 25 | 73 | 75 | 97 |    |
| Colistin            |                                    |      |      |      |     |    |    | *89 | 2   | 1   | 1  | 2  | 2   |     |             |     |              |     |           |     |                 |           |     |               | 89  | 92 | 2  | 2  | 6  | 6  | 91 | 94 | 6  | 6  | 97 |    |    |
| Cefotaxime          |                                    |      |      |      | *89 | 6  | 1  |     |     |     |    |    |     |     |             |     |              |     | 95        | 98  | 1               | 1         | 1   | 1             | 89  | 92 | 8  | 8  | 97 |    |    |    |    |    |    |    |    |
| Meropenem           | *97                                |      |      |      |     |    |    |     |     |     |    |    |     |     |             |     | 97           | 100 | 0         | 0   | 0               | 0         | 97  | 100           | 0   | 0  | 97 |    |    |    |    |    |    |    |    |    |    |
| Ciprofloxacin       | *6                                 |      |      | 1    | 6   | 17 | 5  | 2   | 6   | 5   | 49 |    |     |     |             |     |              |     |           |     |                 |           | 7   | 7             | 23  | 24 | 67 | 69 | 6  | 6  | 91 | 94 | 97 |    |    |    |    |
| Tigecycline         |                                    |      |      |      | *29 | 43 | 22 | 3   |     |     |    |    |     |     |             |     |              |     |           | -   | -               | -         | -   | -             | -   | 72 | 74 | 25 | 26 | 97 |    |    |    |    |    |    |    |

| Antimicrobial agent | Number of strains with MIC (mg/ml) |    |    |    |     |     |     |      |      |     | Susceptible |     | Intermediate |     | Resistant |     | Wild type |     | Non-wild type |    | No. of isolates |
|---------------------|------------------------------------|----|----|----|-----|-----|-----|------|------|-----|-------------|-----|--------------|-----|-----------|-----|-----------|-----|---------------|----|-----------------|
|                     |                                    |    |    |    |     |     |     |      |      |     |             |     |              |     |           |     |           |     |               |    |                 |
|                     | ≤8                                 | 16 | 32 | 64 | 128 | 256 | 512 | 1024 | 2048 | [n] | [%]         | [n] | [%]          | [n] | [%]       | [n] | [%]       | [n] | [%]           |    |                 |
| Sulfamethaxole      | *8                                 | 4  | 2  | 1  |     |     |     |      | 82   | 15  | 15          | 0   | 0            | 82  | 85        | 15  | 15        | 82  | 85            | 97 |                 |

\* No visible growth at this concentration, meaning MIC is equal to or below this concentration. | -- CLSI breakpoint between susceptible and intermediate,  
 | -- CLSI breakpoint between intermediate and resistant and | -- ECOFF value between wild type and non-wild type.

Table S3: Minimum inhibitory concentration distribution for *E. coli* in fecal samples of Sonali

| Antimicrobial agent | Number of strains with MIC (mg/ml) |      |      |      |      |      |    |    |    |     |    |    |     |     |     |      |     |     |     |     |     |     | Susceptible |     | Intermediate |  | Resistant |  | Wild type |  | Non-wild type |  | No. of isolates |
|---------------------|------------------------------------|------|------|------|------|------|----|----|----|-----|----|----|-----|-----|-----|------|-----|-----|-----|-----|-----|-----|-------------|-----|--------------|--|-----------|--|-----------|--|---------------|--|-----------------|
|                     |                                    |      |      |      |      |      |    |    |    |     |    |    |     |     |     | type |     |     |     |     |     |     |             |     |              |  |           |  |           |  |               |  |                 |
|                     | ≤0.03                              | 0.06 | 0.12 | 0.25 | 0.5  | 1    | 2  | 4  | 8  | 16  | 32 | 64 | 128 | 256 | [n] | [%]  | [n] | [%] | [n] | [%] | [n] | [%] | [n]         | [%] |              |  |           |  |           |  |               |  |                 |
| Gentamicin          |                                    |      |      |      | *24  | 75   | 81 | 14 | 1  |     |    | 57 |     | 180 | 71  | 15   | 6   | 57  | 23  | 180 | 71  | 72  | 29          | 252 |              |  |           |  |           |  |               |  |                 |
| Tetracycline        |                                    |      |      |      |      |      | *1 |    |    |     | 2  | 25 | 224 | 1   | 0   | 0    | 0   | 251 | 100 | 1   | 0   | 251 | 100         | 252 |              |  |           |  |           |  |               |  |                 |
| Ceftazidime         |                                    |      |      |      | *241 | 1    | 2  | 1  | 3  | 4   |    |    |     | 244 | 96  | 4    | 2   | 4   | 2   | 242 | 96  | 11  | 4           | 252 |              |  |           |  |           |  |               |  |                 |
| Trimethoprim        |                                    |      |      | *6   | 5    | 3    |    | 2  |    |     | 1  |    | 235 | 16  | 6   | 0    | 0   | 236 | 94  | 14  | 6   | 238 | 94          | 252 |              |  |           |  |           |  |               |  |                 |
| Ampicillin          |                                    |      |      |      |      | *1   | 8  | 8  | 2  | 1   |    |    | 232 | 17  | 7   | 3    | 1   | 232 | 92  | 19  | 8   | 233 | 92          | 252 |              |  |           |  |           |  |               |  |                 |
| Chloramphenicol     |                                    |      |      |      |      |      |    |    | 36 | 40  | 15 | 29 | 28  | 104 | 0   | 0    | 76  | 30  | 176 | 70  | 76  | 30  | 176         | 70  | 252          |  |           |  |           |  |               |  |                 |
| Azithromycin        |                                    |      |      |      |      |      |    | 1  | 7  | 62  | 33 | 29 | 120 | 8   | 3   | 62   | 25  | 182 | 72  | 70  | 28  | 182 | 72          | 252 |              |  |           |  |           |  |               |  |                 |
| Nalidixic acid      |                                    |      |      |      |      |      |    | *1 | 4  | 15  | 7  | 3  |     | 222 | 5   | 2    | 15  | 6   | 232 | 92  | 5   | 2   | 247         | 98  | 252          |  |           |  |           |  |               |  |                 |
| Colistin            |                                    |      |      |      |      | *227 | 4  | 10 | 10 |     | 1  |    |     | 227 | 90  | 4    | 2   | 21  | 8   | 231 | 92  | 21  | 8           | 252 |              |  |           |  |           |  |               |  |                 |
| Cefotaxime          |                                    |      |      | *238 | 5    |      | 3  |    | 6  |     |    |    |     | 243 | 97  | 3    | 1   | 6   | 2   | 238 | 94  | 14  | 6           | 252 |              |  |           |  |           |  |               |  |                 |
| Meropenem           |                                    | *252 |      |      |      |      |    |    |    |     |    |    |     | 252 | 100 | 0    | 0   | 0   | 0   | 252 | 100 | 0   | 0           | 252 |              |  |           |  |           |  |               |  |                 |
| Ciprofloxacin       | *1                                 | 1    | 2    |      | 11   | 11   | 13 | 9  | 20 | 184 |    |    |     | 4   | 2   | 11   | 4   | 237 | 94  | 2   | 1   | 250 | 99          | 252 |              |  |           |  |           |  |               |  |                 |
| Tigecycline         |                                    |      |      | *73  | 94   | 68   | 8  | 2  | 3  | 4   |    |    |     | -   | -   | -    | -   | -   | -   | 167 | 66  | 85  | 34          | 252 |              |  |           |  |           |  |               |  |                 |

| Antimicrobial agent | Number of strains with MIC (mg/ml) |    |    |    |     |     |     |      |      |     |             |     |              |     |           |     | Wild type | Non-wild type |    | No. of isolates |
|---------------------|------------------------------------|----|----|----|-----|-----|-----|------|------|-----|-------------|-----|--------------|-----|-----------|-----|-----------|---------------|----|-----------------|
|                     |                                    |    |    |    |     |     |     |      |      |     | Susceptible |     | Intermediate |     | Resistant |     |           |               |    |                 |
|                     | ≤8                                 | 16 | 32 | 64 | 128 | 256 | 512 | 1024 | 2048 | [n] | [%]         | [n] | [%]          | [n] | [%]       | [n] |           | [%]           |    |                 |
| Sulfamethaxole      | 2                                  | 4  | 5  |    |     |     |     | 1    | 240  | 11  | 4           | 0   | 0            | 241 | 96        | 11  | 4         | 241           | 96 | 252             |

\* No visible growth at this concentration, meaning MIC is equal to or below this concentration. | -- CLSI breakpoint between susceptible and intermediate,  
 | -- CLSI breakpoint between intermediate and resistant and | -- ECOFF value between wild type and non-wild type.

Table S4: Minimum inhibitory concentration distribution for *E. coli* in environmental samples of Sonali

| Antimicrobial agent | Number of strains with MIC (mg/ml) |      |      |      |     |     |     |     |     |     |     |     |     |     |     |     |     |     |     |     |     |     |    |    | Susceptible |  | Intermediate |  | Resistant |  | Wild type |  | Non- wild type |  | No. of isolates |
|---------------------|------------------------------------|------|------|------|-----|-----|-----|-----|-----|-----|-----|-----|-----|-----|-----|-----|-----|-----|-----|-----|-----|-----|----|----|-------------|--|--------------|--|-----------|--|-----------|--|----------------|--|-----------------|
|                     | ≤0.03                              | 0.06 | 0.12 | 0.25 | 0.5 | 1   | 2   | 4   | 8   | 16  | 32  | 64  | 128 | 256 |     |     |     |     |     |     |     |     |    |    |             |  |              |  |           |  |           |  |                |  |                 |
|                     | [n]                                | [%]  | [n]  | [%]  | [n] | [%] | [n] | [%] | [n] | [%] | [n] | [%] | [n] | [%] | [n] | [%] | [n] | [%] | [n] | [%] | [n] | [%] |    |    |             |  |              |  |           |  |           |  |                |  |                 |
| Gentamicin          |                                    |      |      |      | *9  | 20  | 22  |     | 5   |     | 1   | 9   |     | 51  | 77  | 5   | 8   | 10  | 15  | 51  | 77  | 15  | 23 | 66 |             |  |              |  |           |  |           |  |                |  |                 |
| Tetracycline        |                                    |      |      |      |     |     | *3  | 5   | 2   |     | 3   | 5   | 48  | 3   | 5   | 7   | 10  | 56  | 85  | 10  | 15  | 56  | 85 | 66 |             |  |              |  |           |  |           |  |                |  |                 |
| Ceftazidime         |                                    |      |      |      | *63 | 1   |     | 1   |     |     | 1   |     |     | 65  | 98  | 0   | 0   | 1   | 2   | 64  | 97  | 2   | 3  | 66 |             |  |              |  |           |  |           |  |                |  |                 |
| Trimethorim         |                                    |      |      | *4   | 10  | 3   |     |     |     |     |     | 49  |     | 17  | 26  | 0   | 0   | 49  | 74  | 17  | 26  | 49  | 74 | 66 |             |  |              |  |           |  |           |  |                |  |                 |
| Ampicilline         |                                    |      |      |      |     |     |     | 7   | 7   | 1   |     | 2   | 1   | 14  | 21  | 1   | 2   | 51  | 77  | 15  | 23  | 51  | 77 | 66 |             |  |              |  |           |  |           |  |                |  |                 |
| Chloramphenicol     |                                    |      |      |      |     |     |     |     |     | *22 | 23  |     | 1   | 0   | 0   | 45  | 68  | 21  | 32  | 45  | 68  | 21  | 32 | 66 |             |  |              |  |           |  |           |  |                |  |                 |
| Azithromycin        |                                    |      |      |      |     |     |     |     | 1   | 21  |     | 11  | 16  | 1   | 2   | 21  | 32  | 44  | 67  | 22  | 33  | 44  | 67 | 66 |             |  |              |  |           |  |           |  |                |  |                 |
| Nalidixic acid      |                                    |      |      |      |     |     |     |     |     | *12 | 9   |     | 4   | 21  | 32  | 4   | 6   | 41  | 62  | 21  | 32  | 45  | 68 | 66 |             |  |              |  |           |  |           |  |                |  |                 |
| Colistin            |                                    |      |      |      |     | *54 | 2   |     | 1   | 5   |     | 4   |     | 54  | 82  | 2   | 3   | 10  | 15  | 56  | 85  | 10  | 15 | 66 |             |  |              |  |           |  |           |  |                |  |                 |
| Cefotaxime          |                                    |      |      | *63  |     | 1   |     | 2   |     |     |     |     |     | 64  | 97  | 2   | 3   | 0   | 0   | 63  | 95  | 3   | 5  | 66 |             |  |              |  |           |  |           |  |                |  |                 |
| Meropenem           |                                    |      | *66  |      |     |     |     |     |     |     |     |     |     | 66  | 100 | 0   | 0   | 0   | 0   | 66  | 100 | 0   | 0  | 66 |             |  |              |  |           |  |           |  |                |  |                 |
| Ciprofloxacin       | *7                                 | 3    |      | 1    | 2   | 10  |     | 3   | 2   | 4   | 1   |     | 33  | 11  | 17  | 12  | 18  | 43  | 65  | 10  | 15  | 56  | 85 | 66 |             |  |              |  |           |  |           |  |                |  |                 |
| Tigecycline         |                                    |      |      | *16  | 30  |     | 10  | 5   | 4   | 1   |     |     |     | -   | -   | -   | -   | -   | -   | 46  | 70  | 20  | 30 | 66 |             |  |              |  |           |  |           |  |                |  |                 |

| Antimicrobial agent | Number of strains with MIC (mg/ml) |    |    |    |     |     |     |      |      |     |             |     |              |     |           |     |           |     | No. of isolates |               |  |
|---------------------|------------------------------------|----|----|----|-----|-----|-----|------|------|-----|-------------|-----|--------------|-----|-----------|-----|-----------|-----|-----------------|---------------|--|
|                     |                                    |    |    |    |     |     |     |      |      |     | Susceptible |     | Intermediate |     | Resistant |     | Wild type |     |                 | Non-wild type |  |
|                     | ≤8                                 | 16 | 32 | 64 | 128 | 256 | 512 | 1024 | 2048 | [n] | [%]         | [n] | [%]          | [n] | [%]       | [n] | [%]       | [n] |                 | [%]           |  |
| Sulfamethaxole      | 1                                  | 3  | 7  | 4  | 2   |     |     |      | 49   | 17  | 26          | 0   | 0            | 49  | 74        | 17  | 26        | 49  | 74              | 66            |  |

\* No visible growth at this concentration, meaning MIC is equal to or below this concentration. -- CLSI breakpoint between susceptible and intermediate,

-- CLSI breakpoint between intermediate and resistant and -- ECOFF value between wild type and non-wild type
